# Supplementary material for: Highly Ordered TiO2 Macropore Arrays as Transparent Photocatalysts
Source: Hindawi journal article supplement (doi:10.1155/2012/762510), 2012-01-01
Supplement: f1 [file 762510.f1.pdf]

# Electronic Supplementary Information

## Highly ordered TiO<sub>2</sub> macropore arrays as transparent photocatalysts

Yuan Dong, Junfeng Chao, Zhong Xie, Xin Xu, Zhuoran Wang and Di Chen\*

Wuhan National Laboratory for Optoelectronics and College of Optoelectronic Science and Engineering, Huazhong University of Science and Technology, Wuhan 430074, China. Fax: 86 27 87792225; E-mail:

[dichen@mail.hust.edu.cn](mailto:dichen@mail.hust.edu.cn)

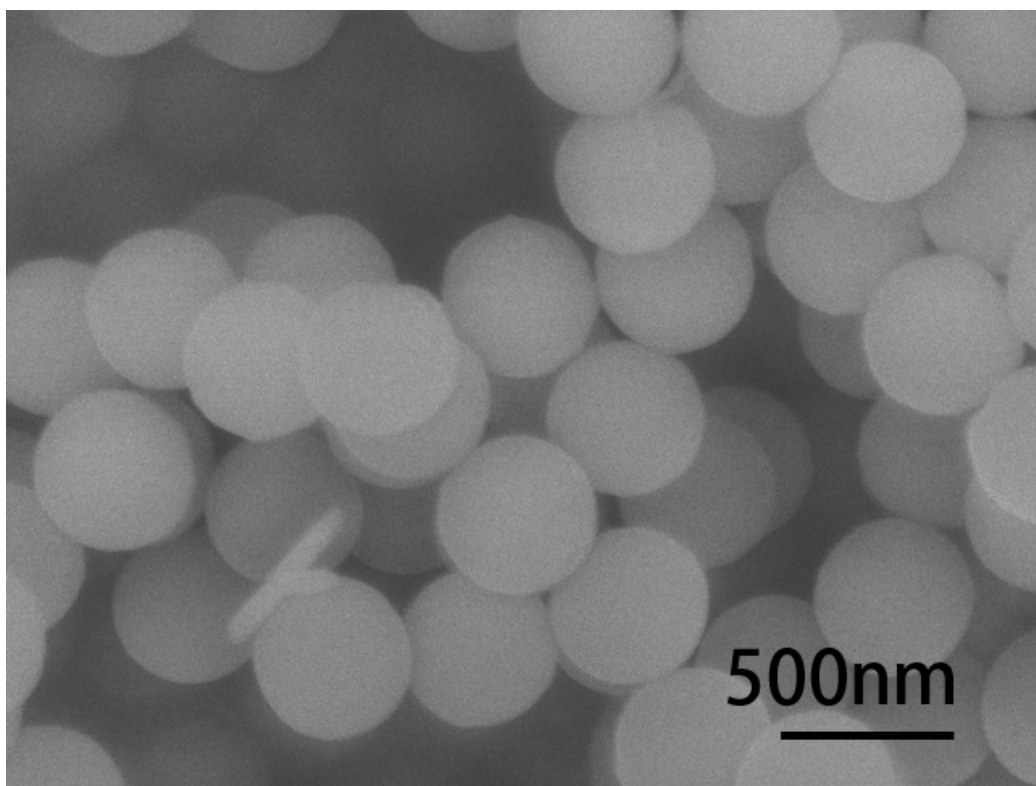

Figure. S1 SEM image of the non-crosslinked, monodispersed polystyrene spheres synthesized by emulsifier-free method. The diameters of polystyrene spheres are 500nm.

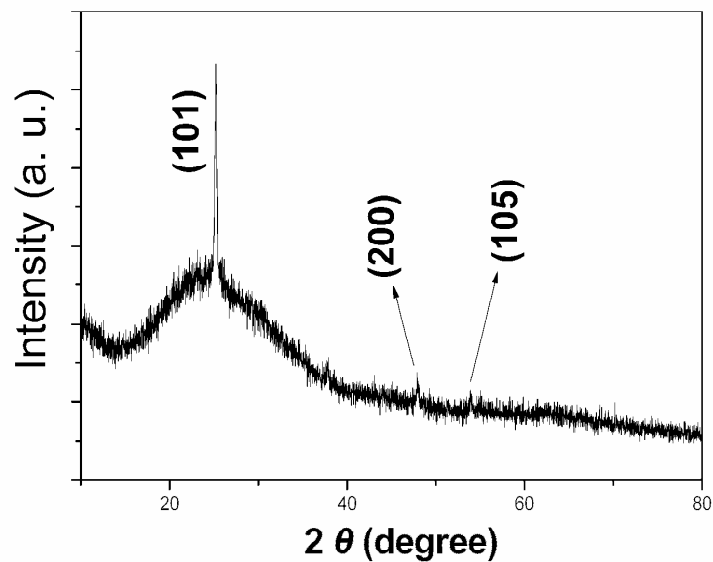

Figure. S2 XRD patterns of 2D TiO<sub>2</sub> ordered arrays. According to this image, diffraction peaks could be indexed as the TiO<sub>2</sub> anatase phase.

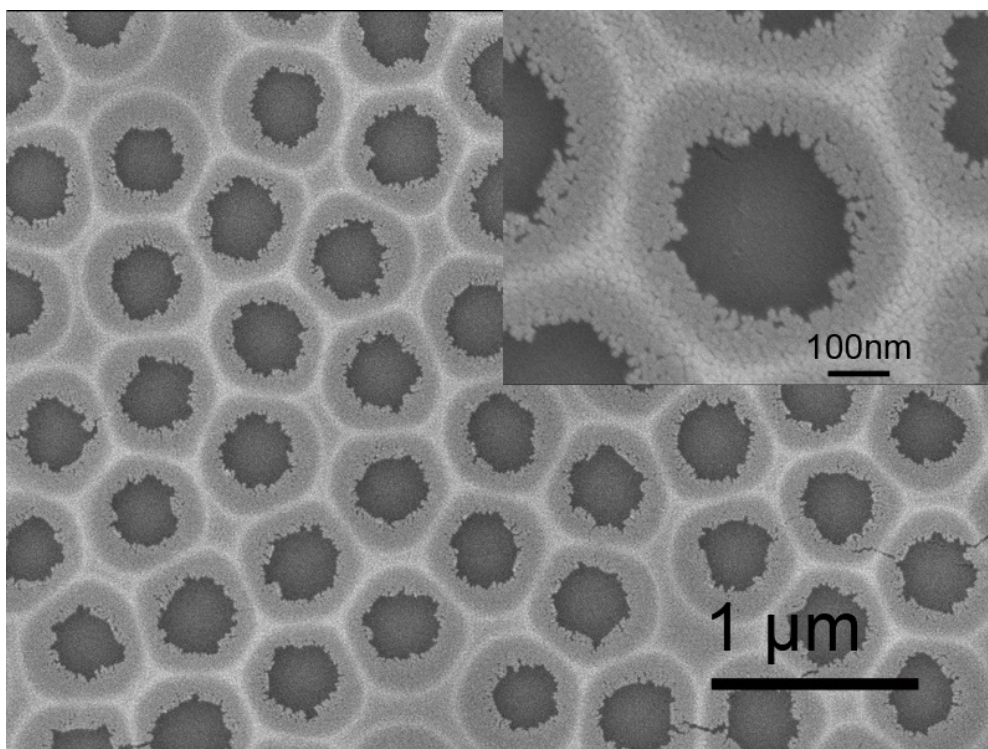

Figure. S3 SEM images of 2D TiO<sub>2</sub> ordered arrays on aluminum substrates in low magnification (30000x). The inset is a high magnification SEM image (150000x).
